# Supplementary material
Source: Springer Nature journal article supplement (http://www.springermedizin.de/resource/supplementary/12889_2012_5344_MOESM1_ESM.pdf/9495098)

## A: Late presentation

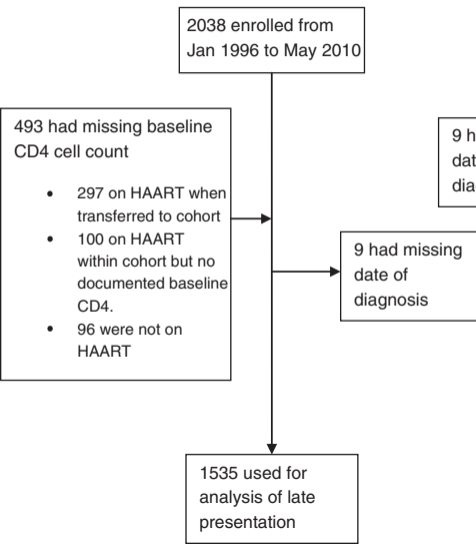

## B: Mortality analysis

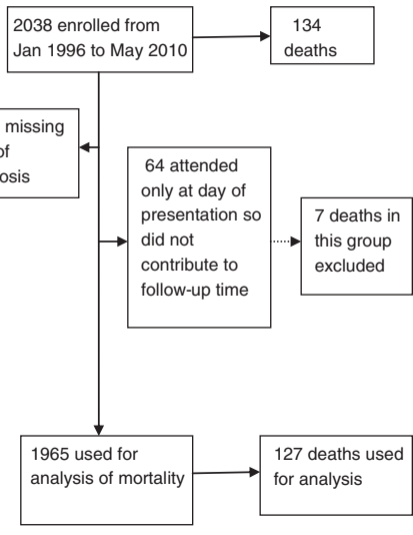

Supplement: MOESM1 [file 9495098]
